# Supplementary material for: Downgrading MELD Improves the Outcomes after Liver Transplantation in Patients with Acute-on-Chronic Hepatitis B Liver Failure
Source: PLOS journal article supplement (doi:10.1371/journal.pone.0030322), 2012-01-24
Supplement: S1 (10.1371/journal.pone.0030322.s001) [file journal.pone.0030322.s001]

**Table S1.** Demographic comparisons among the ELT, DGM and N-DGM groups

|  | Patients with MELD ≥ 30 (n = 126) | | |
| --- | --- | --- | --- |
|  | ELT group | DGM group | N-DGM group |
|  | (n = 42) | (n = 33) | (n = 51) |
| Donor age (y) | 39.5 ± 12.2 | 40.3 ± 10.5 | 40.1 ± 9.1 |
| Recipient age (y) ***** | 42.3 ± 10.2 | 42.1 ± 12.1 | 46.5 ± 8.0 |
| Donor male/female | 40/2 | 29/4 | 48/3 |
| Recipient male/female | 39/3 | 28/5 | 46/5 |
| Cold ischemia time (h) | 10.2 ± 5.7 | 10.5 ± 6.5 | 10.4 ± 5.3 |
| Donor graft steatosis (n) | | | |
| No | 33 | 27 | 42 |
| Mild (< 30%) | 6 | 4 | 7 |
| Moderate (30-60%) | 3 | 2 | 2 |
| Primary liver diseases (n) | | | |
| Acute exacerbation of chronic hepatitis B | 8 | 5 | 8 |
| Acute deterioration of cirrhosis | 34 | 28 | 43 |
| Complications (n) | | | |
| Hepatic encephalopathy ***** | 21 | 12 | 30 |
| Hepatorenal syndrome ****** | 9 | 6 | 24 |
| Upper gastrointestinal bleeding | 11 | 4 | 7 |
| Ascites | 30 | 22 | 38 |
| Infection ****** | 10 | 6 | 24 |
| Pre-transplant data | | | |
| MELD score | | | |
| On the day of listing | 34.8 ± 4.1 | 33.7 ± 3.6 | 35.1 ± 3.9 |
| On the day of transplant ***** | 34.9 ± 3.8 | 26.2 ± 2.3 | 35.7 ± 4.1 |
| Delta-MELD ***** | 0.1 ± 3.8 | -7.5 ± 4.2 | 1.9 ± 5.0 |
| HBV DNA > 1 × 105 copies/ml | 22 | 20 | 26 |
| Serum sodium (mEq/L) | 137.8 ± 7.6 | 138.6 ± 4.8 | 136.7 ± 6.6 |
| Serum potassium (mEq/L) | 4.5 ± 0.8 | 4.1 ± 0.6 | 4.4 ± 0.8 |
| Intensive care (n) | 13 | 12 | 21 |

Abbreviations: DGM, downgraded MELD; ELT, emergency liver transplantation; MELD, model for end-stage liver disease; N-DGM, non-downgraded MELD;

*****: N-DGM group vs. DGM group, *P* < 0.05;

******: N-DGM group vs. DGM group, *P* < 0.05; N-DGM group vs. ELT group, *P* < 0.05;
